# Supplementary material for: Age and Chemistry of Dissolved Organic Carbon Reveal Enhanced Leaching of Ancient Labile Carbon at the Permafrost Thaw Zone
Source: Copernicus journal article supplement (doi:10.5194/bg-2021-272), 2021-10-20
Supplement: Supplementary file 1 [file bg-2021-272-supplement.pdf]

## Supplementary Information for

# Age and Chemistry of Dissolved Organic Carbon Reveal Enhanced Leaching of Ancient Labile Carbon at the Permafrost Thaw Zone

Karis J. McFarlane<sup>1</sup>, Heather M. Throckmorton<sup>2,3</sup>, Jeffrey M. Heikoop<sup>2</sup>, Brent D. Newman<sup>2</sup>, Alexandra L. Hedgpeth<sup>1,4</sup>, Marisa N. Repasch<sup>1</sup>, Thomas P. Guilderson<sup>1,5</sup>, Cathy J. Wilson<sup>2</sup>

<sup>1</sup>Center for Accelerator Mass Spectrometry, Lawrence Livermore National Laboratory, Livermore, 94550, USA

<sup>2</sup>Earth and Environmental Sciences Division, Los Alamos National Laboratory, Los Alamos, 87545, USA

<sup>3</sup>Currently at Agilent Technologies, Lexington, 02421, USA

<sup>4</sup>Department of Geography, University of California, Los Angeles, 90095, USA

<sup>5</sup>Currently at University of California, Santa Cruz, 95064, USA

Correspondence to: Karis J. McFarlane ([mcfarlane3@llnl.gov](mailto:mcfarlane3@llnl.gov))

## Supplementary Figures

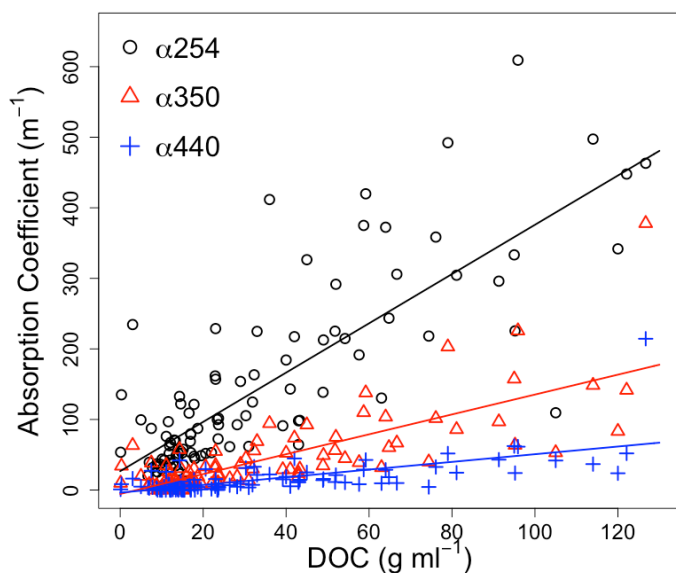

Figure S1. Absorption coefficients for 254, 350, and 440 nm wavelengths and DOC concentration. Regression followed by correlation: a254: slope = 3.49, R<sup>2</sup> = 0.65, p < 0.01; a350: slope = 1.41, R<sup>2</sup> = 0.59, p < 0.01; a440: slope = 0.54, R<sup>2</sup> = 0.42, p < 0.01.

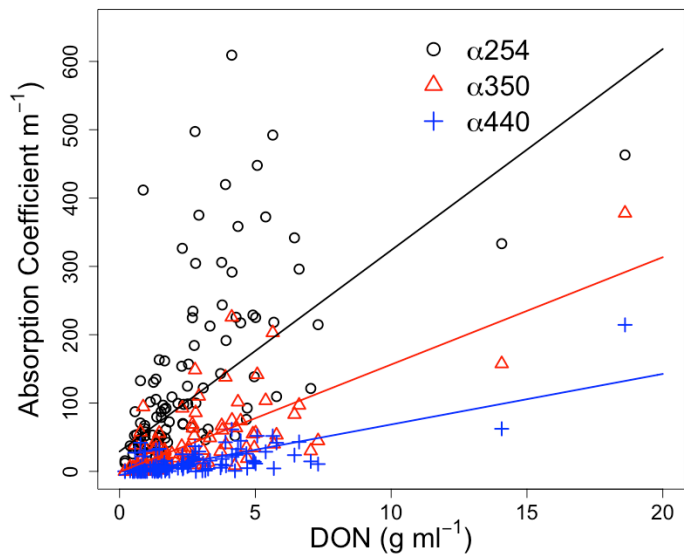

Figure S2. Absorption coefficients for 254, 350, and 440 nm wavelengths and DON concentration. Regression followed by correlation:  $\alpha_{254}$ : slope = 29.45,  $R^2 = 0.58$ ,  $p < 0.01$ ;  $\alpha_{350}$ : slope = 15.71,  $R^2 = 0.74$ ,  $p < 0.01$ ;  $\alpha_{440}$ : slope = 7.40,  $R^2 = 0.77$ ,  $p < 0.01$ .

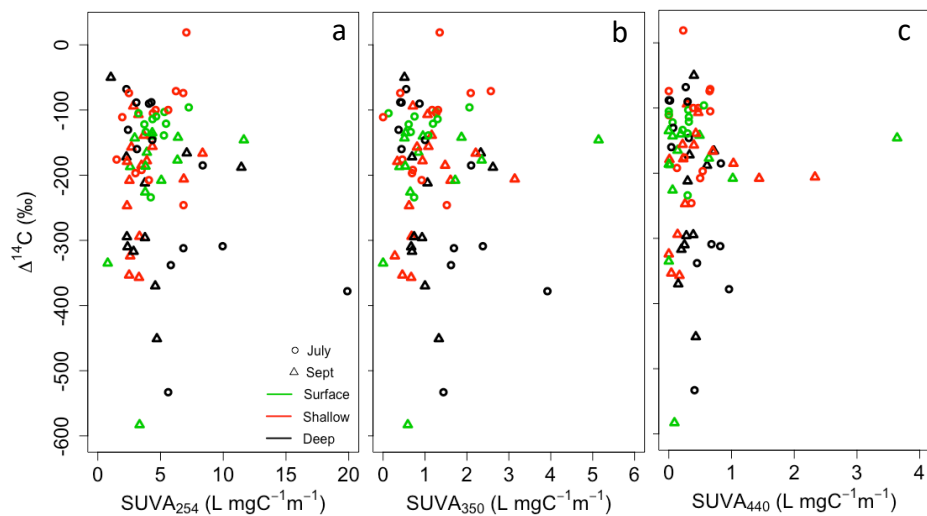

Figure S3.  $SUVA_{254}$  (a),  $SUVA_{350}$  (b), and  $SUVA_{440}$  vs.  $^{14}C$  of DOC.
